# Supplementary material
Source: Research Square preprint supplement (doi:10.21203/rs.3.rs-9247601/v1)
Supplement: Supplementary file 1 [file a61e9ed142d6c3a55bbe8c8e.docx]

| **Supplementary Table S1.**  Receiver operating characteristic analysis for predicting AI correctness | | |
| --- | --- | --- |
| **Model** | **AUC** | **95% CI** |
| Claude Opus 4.6 | 0.749 | 0.657–0.842 |
| Gemini 3.1 Flash Lite | 0.691 | 0.602–0.780 |
| GPT-5.4 | 0.723 | 0.631–0.816 |

| **Supplementary Table S2.** Pairwise comparison of ROC curves using DeLong tests | | |
| --- | --- | --- |
| **Comparison** | **AUC difference** | **p-value** |
| Claude Opus 4.6 vs Gemini 3.1 Flash Lite | 0.058 | 0.372 |
| Claude Opus 4.6 vs GPT-5.4 | 0.026 | 0.697 |
| Gemini 3.1 Flash Lite vs GPT-5.4 | −0.032 | 0.620 |
|  | | |

| **Supplementary Table S3.** Human–AI error overlap across all models | |
| --- | --- |
| **Model** | **Error overlap** |
| Gemini 3.1 Flash Lite | 52.94% |
| Claude Opus 4.6 | 48.15% |
| MedQwen | 43.01% |
| GPT-5.4 | 31.43% |
| Qwen-3.5-35B | 29.01% |

| **Supplementary Table S4.** AI accuracy stratified by item discrimination | | | | | |
| --- | --- | --- | --- | --- | --- |
| **Discrimination band** | **Claude Opus 4.6** | **Gemini 3.1 Flash Lite** | **GPT-5.4** | **MedQwen** | **Qwen-3.5-35B** |
| Low | 83.61% | 86.89% | 81.97% | 52.46% | 19.67% |
| Moderate | 80.65% | 72.58% | 77.42% | 53.23% | 17.74% |
| High | 93.42% | 88.16% | 86.84% | 53.95% | 18.42% |

| **Supplementary Table S5.** Concordance between AI errors and human distractor selections | |
| --- | --- |
| **Model** | **Mean distractor concordance** |
| Gemini 3.1 Flash Lite | 25.46% |
| Claude Opus 4.6 | 23.80% |
| GPT-5.4 | 22.69% |
| MedQwen | 19.08% |
| Qwen-3.5-35B | 11.76% |
| **Footnote:** Distractor concordance represents the proportion of incorrect AI responses that matched the most frequently selected incorrect option among residents. | |
